# Supplementary material for: Characterization of exogenous DNA mobility in live cells through fluctuation correlation spectroscopy
Source: PubMed Central journal article supplement (PMC4564760; doi:10.1038/srep13848), 2015-09-10
Supplement: srep13848-s1.pdf [file srep13848-s1.pdf]

## Supplementary Information

### Characterization of exogenous DNA mobility in live cells through fluctuation correlation spectroscopy

Stephen Mieruszynski <sup>1</sup>, Michelle A. Digman <sup>2,3</sup>, Enrico Gratton <sup>2,3</sup>, Mark R Jones <sup>1\*</sup>

<sup>1</sup> University of Western Sydney, School of Science and Health, Hawkesbury Campus, Locked Bag 1797, Penrith NSW 2751, Australia.

<sup>2</sup> Department of Developmental and Cell Biology, University of California Irvine, Irvine, California, United States of America; Department of Biomedical Engineering, Laboratory for Fluorescence Dynamics, University of California Irvine, Irvine, California, United States of America.

<sup>3</sup> *Centre for Bioactive Discovery in Health and Ageing, School of Science and Technology, University of New England, Armidale, Australia.*

*\* Corresponding author:*

Name: Mark R Jones

Address: University of Western Sydney, School of Science and Health, Hawkesbury Campus Building K12.53, Locked Bag 1797, Penrith NSW 2751, Australia

Telephone Number: 61 02 4570 1444

Email: [m.r.jones@uws.edu.au](mailto:m.r.jones@uws.edu.au)

## Supplementary Figure 1

**A**

|              | DNA Size (bp)   | Mean ( $\mu\text{m}^2/\text{s}$ ) | Standard Deviation | Range ( $\mu\text{m}^2/\text{s}$ ) |         |
|--------------|-----------------|-----------------------------------|--------------------|------------------------------------|---------|
|              |                 |                                   |                    | Minimum                            | Maximum |
| DNA Fragment | 21              | 55.11                             | 4.79               | 45.77                              | 64.89   |
|              | 120             | 20.86                             | 2.45               | 16.65                              | 26.90   |
|              | 240             | 13.16                             | 0.81               | 11.46                              | 13.92   |
|              | 495             | 6.01                              | 1.15               | 3.59                               | 7.88    |
|              | 1000            | 3.43                              | 0.51               | 2.34                               | 4.86    |
|              | 1985            | 2.80                              | 0.50               | 1.92                               | 3.99    |
|              | 5472 (Linear)   | 1.23                              | 0.10               | 0.94                               | 1.44    |
|              | 5472 (Circular) | 1.83                              | 0.17               | 1.51                               | 2.36    |
| Lipoplex     | 21              | 18.65                             | 5.58               | 12.95                              | 29.76   |
|              | 120             | 4.37                              | 2.38               | 1.45                               | 15.59   |
|              | 240             | 2.94                              | 0.43               | 2.05                               | 3.61    |
|              | 495             | 1.96                              | 0.79               | 0.77                               | 4.15    |
|              | 1000            | 1.26                              | 0.24               | 0.56                               | 1.78    |
|              | 1985            | 1.10                              | 0.51               | 0.51                               | 4.15    |
|              | 5472 (Linear)   | 0.89                              | 0.23               | 0.31                               | 2.13    |
|              | 5472 (Circular) | 3.71                              | 0.50               | 1.87                               | 5.18    |

\*All samples were separately repeated 10 times, and sampled 10 times (n = 100)

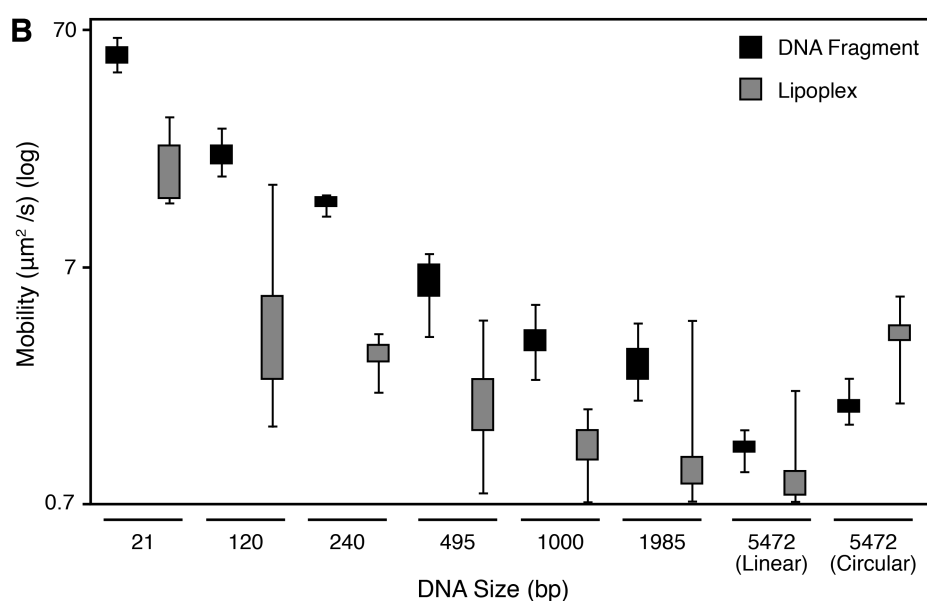

**Supplementary Figure 1. RICS analysis of DNA and lipoplexes in solution.** DNA of various sizes was studied either alone, or complexed as lipoplexes in solution to elucidate the intrinsic diffusion of each. (A) The values and (B) graph demonstrate a size dependent mobility when simple diffusion occurs in solution. When the DNA is linear, the lipoplexes always exhibited slower diffusion, whereas the circular plasmid had an increased rate once complexed with lipids.

## Supplementary Figure 2

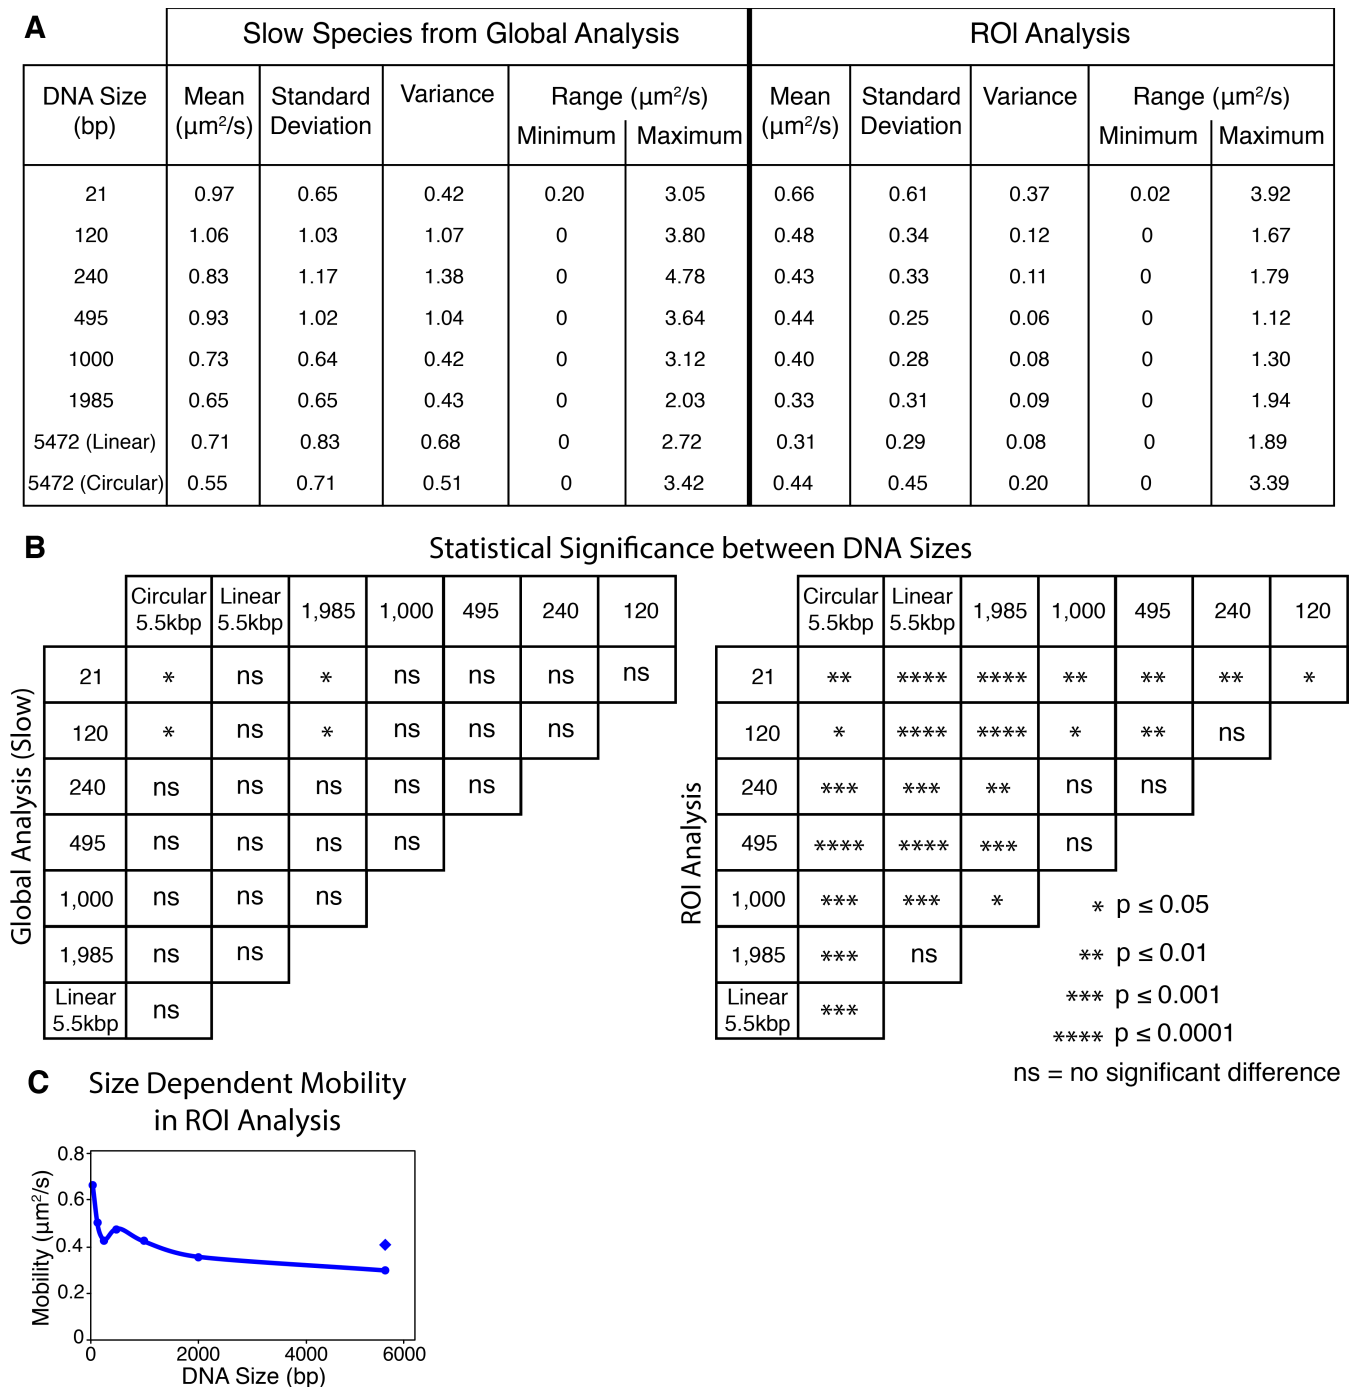

**Supplementary Figure 2. Cytoplasmic mobility of delivered DNA.** When transfected, the DNA was analysed through a global and ROI RICS analysis. Through the global analysis a slower species was isolated that was similar to the values obtained through the ROI analysis. (A) The mean, standard deviation, variance and upper and lower ranges of the cytoplasmic localised DNA has been presented for the slow species of the global and ROI analysis. (B) Statistical analysis was performed using a T Test assuming unequal variances showing that the global analysis resulted in mobility rates that were statistically insignificant from each other. However, in the ROI analysis, the mobility of most fragments was statistically significant. (C) The mean mobility obtained in the ROI analysis has been plotted in a scatter plot demonstrating the size dependent mobility of the DNA. Diamond in graph (C) represents the circular plasmid.

# Supplementary Figure 3

## A ROI data values based on cell location and DNA cluster size

| DNA Size (bp)   | Intracellular Position |           |              | Cluster Size |               |               |
|-----------------|------------------------|-----------|--------------|--------------|---------------|---------------|
|                 | Cell Extremity         | Cytoplasm | Peri-nuclear | Diffuse      | Small Cluster | Large Cluster |
| 21              | NA                     | NA        | NA           | 0.57         | 0.82          | 0.55          |
| 120             | 0.44                   | 0.51      | 0.47         | 0.78         | 0.56          | 0.27          |
| 240             | 0.34                   | 0.46      | 0.38         | 0.49         | 0.46          | 0.35          |
| 495             | 0.39                   | 0.46      | 0.42         | 0.60         | 0.47          | 0.37          |
| 1000            | 0.34                   | 0.48      | 0.34         | 0.48         | 0.40          | 0.39          |
| 1985            | 0.17                   | 0.39      | 0.32         | 0.51         | 0.36          | 0.22          |
| 5472 (Linear)   | 0.20                   | 0.36      | 0.29         | 0.32         | 0.38          | 0.24          |
| 5472 (Circular) | 0.21                   | 0.48      | 0.38         | 0.66         | 0.48          | 0.34          |

## B Intraellular location significant differences

| Cell Edge     |                 |               |       |       |     |     | Cytoplasm     |                 |               |       |       |     |     | Peri-nuclear  |                 |               |       |       |     |     |    |
|---------------|-----------------|---------------|-------|-------|-----|-----|---------------|-----------------|---------------|-------|-------|-----|-----|---------------|-----------------|---------------|-------|-------|-----|-----|----|
|               | Circular 5.5kbp | Linear 5.5kbp | 1,985 | 1,000 | 495 | 240 |               | Circular 5.5kbp | Linear 5.5kbp | 1,985 | 1,000 | 495 | 240 |               | Circular 5.5kbp | Linear 5.5kbp | 1,985 | 1,000 | 495 | 240 |    |
| 120           | ***             | ***           | ***   | ns    | ns  | ns  | 120           | ns              | ***           | ***   | ns    | ns  | ns  | 120           | ns              | **            | **    | ns    | ns  | ns  | ns |
| 240           | *               | **            | **    | ns    | ns  |     | 240           | ns              | **            | ns    | ns    | ns  |     | 240           | ns              | ns            | ns    | ns    | ns  | ns  |    |
| 495           | ***             | ***           | ****  | ns    |     |     | 495           | ns              | **            | ns    | ns    |     |     | 495           | ns              | ns            | ns    | ns    |     |     |    |
| 1,000         | **              | **            | ***   |       |     |     | 1,000         | ns              | ***           | ns    |       |     |     | 1,000         | ns              | ns            | ns    |       |     |     |    |
| 1,985         | ns              | ns            |       |       |     |     | 1,985         | ns              | ns            |       |       |     |     | 1,985         | ns              | ns            |       |       |     |     |    |
| Linear 5.5kbp | ns              |               |       |       |     |     | Linear 5.5kbp | **              |               |       |       |     |     | Linear 5.5kbp | **              |               |       |       |     |     |    |

## C DNA cluster size significant differences

| Diffuse       |                 |               |       |       |     |     |     |               | Small Clusters  |               |       |       |     |     |     |               |                 | Large Clusters |       |       |     |     |     |     |  |  |
|---------------|-----------------|---------------|-------|-------|-----|-----|-----|---------------|-----------------|---------------|-------|-------|-----|-----|-----|---------------|-----------------|----------------|-------|-------|-----|-----|-----|-----|--|--|
|               | Circular 5.5kbp | Linear 5.5kbp | 1,985 | 1,000 | 495 | 240 | 120 |               | Circular 5.5kbp | Linear 5.5kbp | 1,985 | 1,000 | 495 | 240 | 120 |               | Circular 5.5kbp | Linear 5.5kbp  | 1,985 | 1,000 | 495 | 240 | 120 |     |  |  |
| 21            | ns              | **            | *     | **    | *   | *** | **  | 21            | **              | ***           | ***   | ***   | **  | **  | *   | 21            | **              | ***            | ****  | *     | **  | **  | **  | *** |  |  |
| 120           | ns              | ****          | ***   | ****  | **  | *** |     | 120           | ns              | ***           | ***   | ***   | ns  | ns  |     | 120           | ns              | ns             | ns    | **    | **  | ns  |     |     |  |  |
| 240           | ns              | **            | ns    | ns    | ns  |     |     | 240           | ns              | **            | *     | ns    | ns  |     |     | 240           | ns              | **             | **    | ns    | ns  |     |     |     |  |  |
| 495           | ns              | ***           | ns    | ns    |     |     |     | 495           | ns              | ns            | ***   | ns    |     |     |     | 495           | ns              | ***            | ***   | ns    |     |     |     |     |  |  |
| 1,000         | ***             | **            | ns    |       |     |     |     | 1,000         | ns              | *             | ns    |       |     |     |     | 1,000         | ns              | ***            | ***   |       |     |     |     |     |  |  |
| 1,985         | ns              | **            |       |       |     |     |     | 1,985         | **              | ns            |       |       |     |     |     | 1,985         | ***             | ns             |       |       |     |     |     |     |  |  |
| Linear 5.5kbp | ***             |               |       |       |     |     |     | Linear 5.5kbp | ****            |               |       |       |     |     |     | Linear 5.5kbp | **              |                |       |       |     |     |     |     |  |  |

## D Mobility in cell locations across all DNA sizes

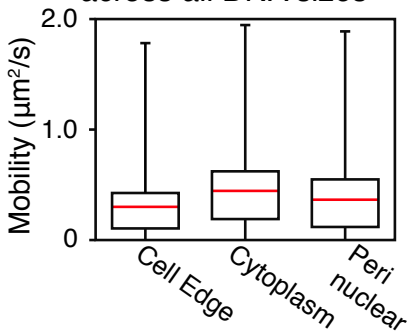

## E Mobility of DNA cluster sizes across all DNA sizes

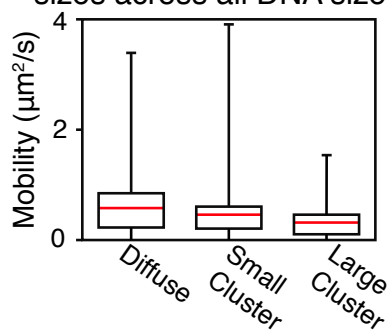

## F Example of DNA cluster sizes

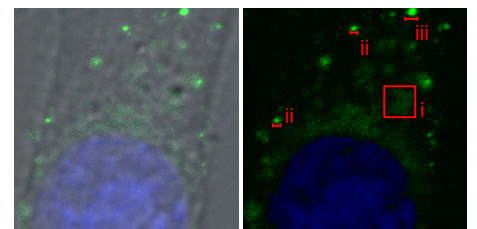

i - Diffuse DNA  
 ii - Small Clusters (400nm)  
 iii - Large Cluster (700nm)  
 Alexa Fluor488  
 Labelled DNA  
 Hoechst 33342

**Supplementary Figure 3. Influence of intracellular location and DNA clustering on DNA mobility.** Through the ROI analysis within the cytoplasm, data was sorted to demonstrate the

influence of the cell position, and cluster size on mobility. (A) The values obtained have been presented, demonstrating a more rapid mobility within the cytoplasm, compared to the cell extremity and peri-nuclear regions. When the DNA did not cluster, it had demonstrated a faster rate of motion. In many cases a range of cluster sizes were observed within a single cell, including DNA that had not clustered. (B) Statistical differences determined between DNA sizes at the cell edge, cytoplasm and peri-nuclear regions. (C) Statistical differences between DNA sizes when DNA is contained within the cytoplasm as diffuse DNA, small clusters and large clusters. (ns = no significant difference, \*  $p \leq 0.05$ , \*\*  $p \leq 0.01$ , \*\*\*  $p \leq 0.001$ , \*\*\*\*  $p < 0.0001$ ). (D) Mobility throughout cell at the cell edge, cytoplasm and perinuclear regions with all DNA sizes combined. Cytoplasm exhibited the fastest mobility, and the cell edge the slowest. (E) Mobility in different cluster forms (diffuse, small and large) all DNA sizes combined. Diffuse DNA exhibited the fastest mobility, and large clusters the slowest. (F) Example of transfected cell with different DNA cluster sizes and diffuse DNA. Image size 12.8x12.8  $\mu\text{m}$ .

## **Supplementary Material and Methods**

### **LysoTracker and Membrane Staining**

LysoTracker Red DND-99 (Molecular Probes, OR, USA) was diluted in FBS-free DMEM to a final concentration of 60 nM. Laurdan (6-dodecanoyl-2-dimethylamino naphthalene; Molecular Probes, OR, USA) was dissolved in dimethylsulfoxide (DMSO) and prepared at a 1.8 mM stock solution. Laurdan was diluted 1:1000 into FBS-free media containing diluted LysoTracker Red. Media containing dyes was prepared as required and kept at 37°C prior to addition to cells.

Cells were transfected with AF488 labelled PCI-Neo plasmid (circular) as outlined in main article. At 6h post addition of DNA lipoplexes, media was aspirated and media containing dyes added. Cells were incubated with dyes for 1h at 37°C, and then washed twice in DMEM (containing 10% FBS v/v). Cells were imaged immediately.

### **Confocal Microscopy**

Confocal images were obtained using a Leica TCS-SP5 equipped with a 63X 1.4 NA water objective. To image Laurdan, AF-488 labelled DNA, and LysoTracker Red images 405 nm, 488 nm, and 568nm laser lines were activated acquiring 415 – 480 nm, 500 – 550 nm and 580 – 630 nm bandwidths, respectively.

## Supplementary Figure 4

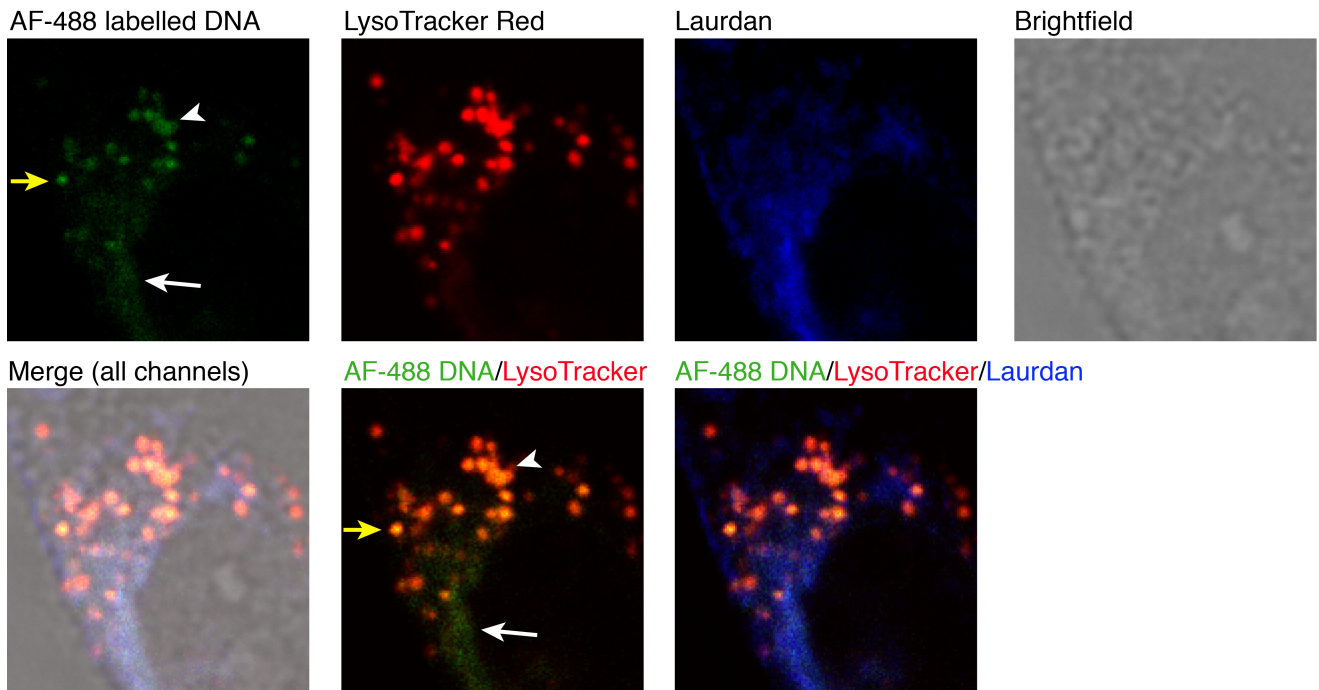

**Supplementary Figure 4. Delivered DNA clusters colocalize with acidified compartments.** Myoblast cell transfected with Af-488 labelled circular PCI-Neo plasmid (green), counterstained for acidified compartments (Red, LysoTracker Red) and cell membranes (blue, Laurdan) with brightfield. Small clusters (yellow arrow) and large clusters (white arrow head) colocalise with acidified compartments, whereas diffuse DNA (white arrow) does not. Image size 12.8x12.8  $\mu\text{m}$ .

## Supplementary Figure 5

| A Random Diffusion |                                   |                    |                   |                                    |         |
|--------------------|-----------------------------------|--------------------|-------------------|------------------------------------|---------|
| DNA Size (bp)      | Mean ( $\mu\text{m}^2/\text{s}$ ) | Standard Deviation | Variance          | Range ( $\mu\text{m}^2/\text{s}$ ) |         |
|                    |                                   |                    |                   | Minimum                            | Maximum |
| 21*                | NA                                |                    |                   |                                    |         |
| 120                | 0.40                              | 0.39               | 0.16              | 0.09                               | 1.02    |
| 240                | 0.45                              | 0.002              | 3.3 <sup>-6</sup> | 0.44                               | 0.46    |
| 495                | 0.34                              | 0.12               | 0.04              | 0.09                               | 0.44    |
| 1000               | 0.22                              | 0.18               | 0.03              | 0.03                               | 0.46    |
| 1985               | 0.12                              | 0.004              | 1.5 <sup>-5</sup> | 0.11                               | 0.13    |
| 5472 (Linear)      | 0.13                              | 0.06               | 0.01              | 0.08                               | 0.15    |
| 5472 (Circular)    | 0.13                              | 0.03               | 0.001             | 0.10                               | 0.15    |

  

| B Active Transport |                                   |                    |          |                                    |         |
|--------------------|-----------------------------------|--------------------|----------|------------------------------------|---------|
| DNA Size (bp)      | Mean ( $\mu\text{m}^2/\text{s}$ ) | Standard Deviation | Variance | Range ( $\mu\text{m}^2/\text{s}$ ) |         |
|                    |                                   |                    |          | Minimum                            | Maximum |
| 21                 | 0.71                              | 0.44               | 0.14     | 0.16                               | 1.89    |
| 120                | 0.64                              | 0.35               | 0.12     | 0.12                               | 1.67    |
| 240                | 0.54                              | 0.39               | 0.16     | 0.03                               | 1.78    |
| 495                | 0.50                              | 0.21               | 0.04     | 0.15                               | 1.05    |
| 1000               | 0.59                              | 0.27               | 0.08     | 0.13                               | 1.29    |
| 1985               | 0.53                              | 0.31               | 0.09     | 0.10                               | 1.66    |
| 5472 (Linear)      | 0.53                              | 0.23               | 0.05     | 0.12                               | 0.88    |
| 5472 (Circular)    | 0.67                              | 0.33               | 0.11     | 0.21                               | 1.49    |

\*No events isolated

  

| C Anomalous Subdiffusion |                                   |                    |          |                                    |         |
|--------------------------|-----------------------------------|--------------------|----------|------------------------------------|---------|
| DNA Size (bp)            | Mean ( $\mu\text{m}^2/\text{s}$ ) | Standard Deviation | Variance | Range ( $\mu\text{m}^2/\text{s}$ ) |         |
|                          |                                   |                    |          | Minimum                            | Maximum |
| 21                       | 0.51                              | 0.14               | 0.02     | 0.31                               | 0.68    |
| 120                      | 0.21                              | 0.14               | 0.02     | 0.05                               | 0.52    |
| 240                      | 0.34                              | 0.18               | 0.03     | 0.12                               | 0.52    |
| 495                      | 0.32                              | 0.19               | 0.04     | 0.09                               | 0.75    |
| 1000                     | 0.28                              | 0.13               | 0.02     | 0.06                               | 0.54    |
| 1985                     | 0.38                              | 0.25               | 0.06     | 0.10                               | 0.96    |
| 5472 (Linear)            | 0.26                              | 0.21               | 0.04     | 0.01                               | 0.89    |
| 5472 (Circular)          | 0.42                              | 0.18               | 0.03     | 0.16                               | 0.77    |

  

| D Confined Diffusion |                                   |                    |          |                                    |         |
|----------------------|-----------------------------------|--------------------|----------|------------------------------------|---------|
| DNA Size (bp)        | Mean ( $\mu\text{m}^2/\text{s}$ ) | Standard Deviation | Variance | Range ( $\mu\text{m}^2/\text{s}$ ) |         |
|                      |                                   |                    |          | Minimum                            | Maximum |
| 21                   | 0.38                              | 0.29               | 0.089    | 0.02                               | 1.39    |
| 120                  | 0.43                              | 0.34               | 0.11     | 0.12                               | 1.14    |
| 240                  | 0.40                              | 0.26               | 0.07     | 0.03                               | 1.09    |
| 495                  | 0.45                              | 0.20               | 0.04     | 0.10                               | 0.90    |
| 1000                 | 0.37                              | 0.25               | 0.07     | 0.06                               | 0.81    |
| 1985                 | 0.24                              | 0.18               | 0.03     | 0.04                               | 0.65    |
| 5472 (Linear)        | 0.26                              | 0.19               | 0.04     | 0.04                               | 0.74    |
| 5472 (Circular)      | 0.26                              | 0.22               | 0.05     | 0.09                               | 0.67    |

  

| E Transient Confinement |                                   |                    |          |                                    |         |
|-------------------------|-----------------------------------|--------------------|----------|------------------------------------|---------|
| DNA Size (bp)           | Mean ( $\mu\text{m}^2/\text{s}$ ) | Standard Deviation | Variance | Range ( $\mu\text{m}^2/\text{s}$ ) |         |
|                         |                                   |                    |          | Minimum                            | Maximum |
| 21                      | 0.73                              | 0.21               | 0.15     | 0.09                               | 1.65    |
| 120                     | 0.63                              | 0.23               | 0.05     | 0.08                               | 0.88    |
| 240                     | 0.52                              | 0.29               | 0.09     | 0.09                               | 1.24    |
| 495                     | 0.49                              | 0.35               | 0.16     | 0.11                               | 1.12    |
| 1000                    | 0.39                              | 0.37               | 0.13     | 0.02                               | 1.39    |
| 1985                    | 0.24                              | 0.15               | 0.02     | 0.01                               | 0.48    |
| 5472 (Linear)           | 0.35                              | 0.17               | 0.03     | 0.14                               | 0.55    |
| 5472 (Circular)         | 0.33                              | 0.22               | 0.05     | 0.10                               | 0.67    |

  

| F Binding-unbinding |                                   |                    |          |                                    |         |
|---------------------|-----------------------------------|--------------------|----------|------------------------------------|---------|
| DNA Size (bp)       | Mean ( $\mu\text{m}^2/\text{s}$ ) | Standard Deviation | Variance | Range ( $\mu\text{m}^2/\text{s}$ ) |         |
|                     |                                   |                    |          | Minimum                            | Maximum |
| 21                  | 0.74                              | 0.37               | 0.14     | 0.13                               | 1.28    |
| 120                 | 0.46                              | 0.33               | 0.11     | 0.03                               | 1.39    |
| 240                 | 0.49                              | 0.36               | 0.12     | 0.05                               | 1.78    |
| 495                 | 0.46                              | 0.24               | 0.06     | 0.05                               | 1.06    |
| 1000                | 0.32                              | 0.29               | 0.08     | 0.05                               | 0.97    |
| 1985                | 0.37                              | 0.34               | 0.12     | 0.03                               | 1.94    |
| 5472 (Linear)       | 0.36                              | 0.34               | 0.11     | 0.03                               | 1.88    |
| 5472 (Circular)     | 0.49                              | 0.39               | 0.15     | 0.01                               | 2.05    |

**Supplementary Figure 5. Relationship between transport mechanisms and motion within the cytoplasm.** The mean, standard deviation, variance and upper and lower range values for the different mechanisms of motion including random diffusion (A), active transport (B), anomalous subdiffusion (C), confined diffusion (D), transient confinement (E) and binding-unbinding (F).



## Supplementary Figure 6

### Significant differences in iMSD analysis across DNA sizes

#### A Random Diffusion

|               | Circular 5.5kbp | Linear 5.5kbp | 1,985 | 1,000 | 495  | 240 | 120 |
|---------------|-----------------|---------------|-------|-------|------|-----|-----|
| 21            | na              | na            | na    | na    | na   | na  | na  |
| 120           | **              | **            | **    | *     | ns   | ns  |     |
| 240           | ****            | ****          | ****  | ****  | **** |     |     |
| 495           | ****            | ****          | ****  | ***   |      |     |     |
| 1,000         | **              | **            | **    |       |      |     |     |
| 1,985         | ns              | ns            |       |       |      |     |     |
| Linear 5.5kbp | ns              |               |       |       |      |     |     |

#### B Active Transport

|               | Circular 5.5kbp | Linear 5.5kbp | 1,985 | 1,000 | 495 | 240 | 120 |
|---------------|-----------------|---------------|-------|-------|-----|-----|-----|
| 21            | ns              | **            | **    | ns    | **  | **  | ns  |
| 120           | ns              | ns            | ns    | ns    | ns  | ns  |     |
| 240           | ns              | ns            | ns    | ns    | ns  |     |     |
| 495           | ns              | ns            | ns    | ns    |     |     |     |
| 1,000         | ns              | ns            | ns    |       |     |     |     |
| 1,985         | ns              | ns            |       |       |     |     |     |
| Linear 5.5kbp | ns              |               |       |       |     |     |     |

#### C Confined Diffusion

|               | Circular 5.5kbp | Linear 5.5kbp | 1,985 | 1,000 | 495 | 240 | 120 |
|---------------|-----------------|---------------|-------|-------|-----|-----|-----|
| 21            | **              | *             | **    | *     | ns  | ns  | ns  |
| 120           | **              | **            | *     | ns    | ns  | ns  |     |
| 240           | *               | *             | *     | ns    | ns  |     |     |
| 495           | *               | *             | **    | ns    |     |     |     |
| 1,000         | ns              | ns            | **    |       |     |     |     |
| 1,985         | ns              | ns            |       |       |     |     |     |
| Linear 5.5kbp | ns              |               |       |       |     |     |     |

#### D Anomalous Subdiffusion

|               | Circular 5.5kbp | Linear 5.5kbp | 1,985 | 1,000 | 495 | 240 | 120 |
|---------------|-----------------|---------------|-------|-------|-----|-----|-----|
| 21            | ns              | **            | ns    | **    | **  | ns  | *** |
| 120           | **              | ns            | **    | ns    | ns  | ns  |     |
| 240           | ns              | ns            | ns    | ns    | ns  |     |     |
| 495           | ns              | ns            | ns    | ns    |     |     |     |
| 1,000         | ns              | ns            | ns    |       |     |     |     |
| 1,985         | ns              | ns            |       |       |     |     |     |
| Linear 5.5kbp | **              |               |       |       |     |     |     |

#### E Transient Confinement

|               | Circular 5.5kbp | Linear 5.5kbp | 1,985 | 1,000 | 495 | 240 | 120 |
|---------------|-----------------|---------------|-------|-------|-----|-----|-----|
| 21            | **              | **            | ***   | **    | *   | ns  | ns  |
| 120           | **              | **            | ****  | **    | ns  | ns  |     |
| 240           | **              | ***           | ****  | ns    | ns  |     |     |
| 495           | *               | **            | ***   | ns    |     |     |     |
| 1,000         | ns              | ns            | **    |       |     |     |     |
| 1,985         | *               | **            |       |       |     |     |     |
| Linear 5.5kbp | ns              |               |       |       |     |     |     |

#### F Binding-unbinding

|               | Circular 5.5kbp | Linear 5.5kbp | 1,985 | 1,000 | 495 | 240 | 120 |
|---------------|-----------------|---------------|-------|-------|-----|-----|-----|
| 21            | ns              | ns            | ns    | ns    | ns  | ns  | ns  |
| 120           | ns              | ns            | ns    | ns    | ns  | ns  |     |
| 240           | ns              | ns            | ns    | ns    | ns  |     |     |
| 495           | ns              | ns            | ns    | ns    |     |     |     |
| 1,000         | ns              | ns            | ns    |       |     |     |     |
| 1,985         | ns              | ns            |       |       |     |     |     |
| Linear 5.5kbp | ns              |               |       |       |     |     |     |

\*  $p \leq 0.05$

\*\*  $p \leq 0.01$

\*\*\*  $p \leq 0.001$

\*\*\*\*  $p \leq 0.0001$

ns = no significant difference

**Supplementary Figure 6. Significant differences in transport mechanisms across DNA sizes.**

## Supplementary Figure 7

Significant differences in iMSD analysis between transport mechanisms

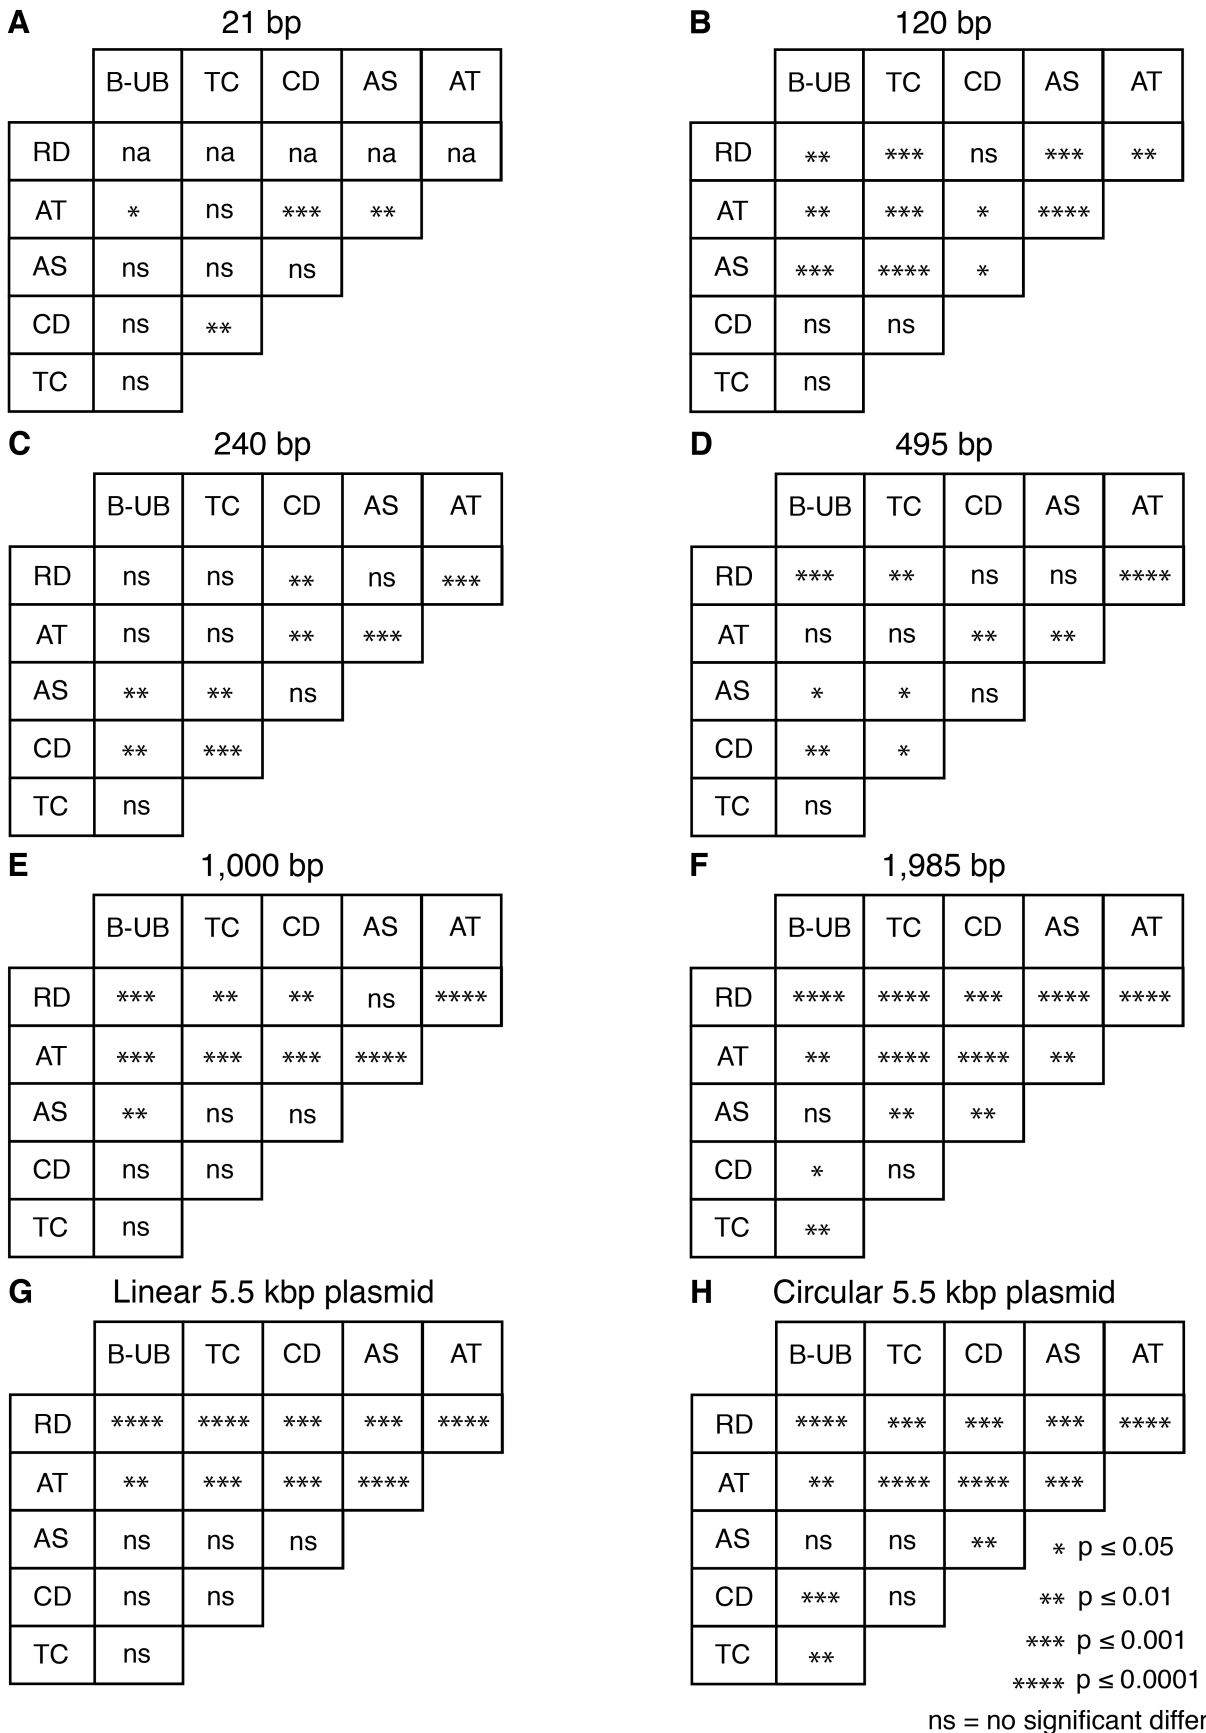

Supplementary Figure 7. Significant differences in between transport mechanisms.

## Supplementary Figure 8

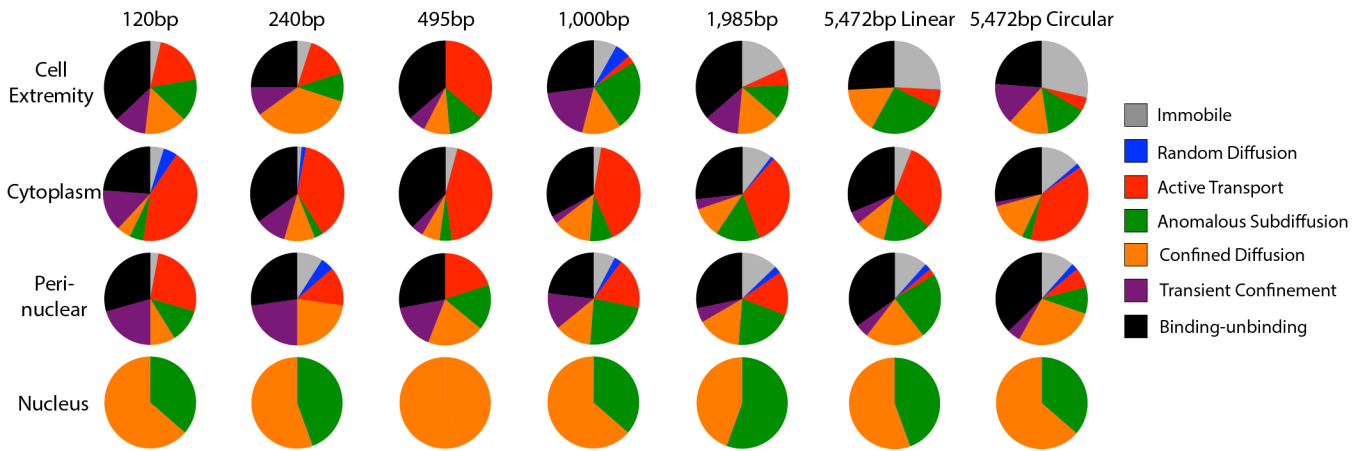

**Supplementary Figure 8. Spatial distribution of transport mechanisms.** The iMSD analysis demonstrated a preference of certain transport mechanisms depending of the location of the cell. This trend was independent of the size of DNA present, as the only significant changes in transport mechanisms was an increase in immobility as the DNA length increased. This figure shows the transport mechanisms for the range of DNA sizes assessed.

# Supplementary Figure 9

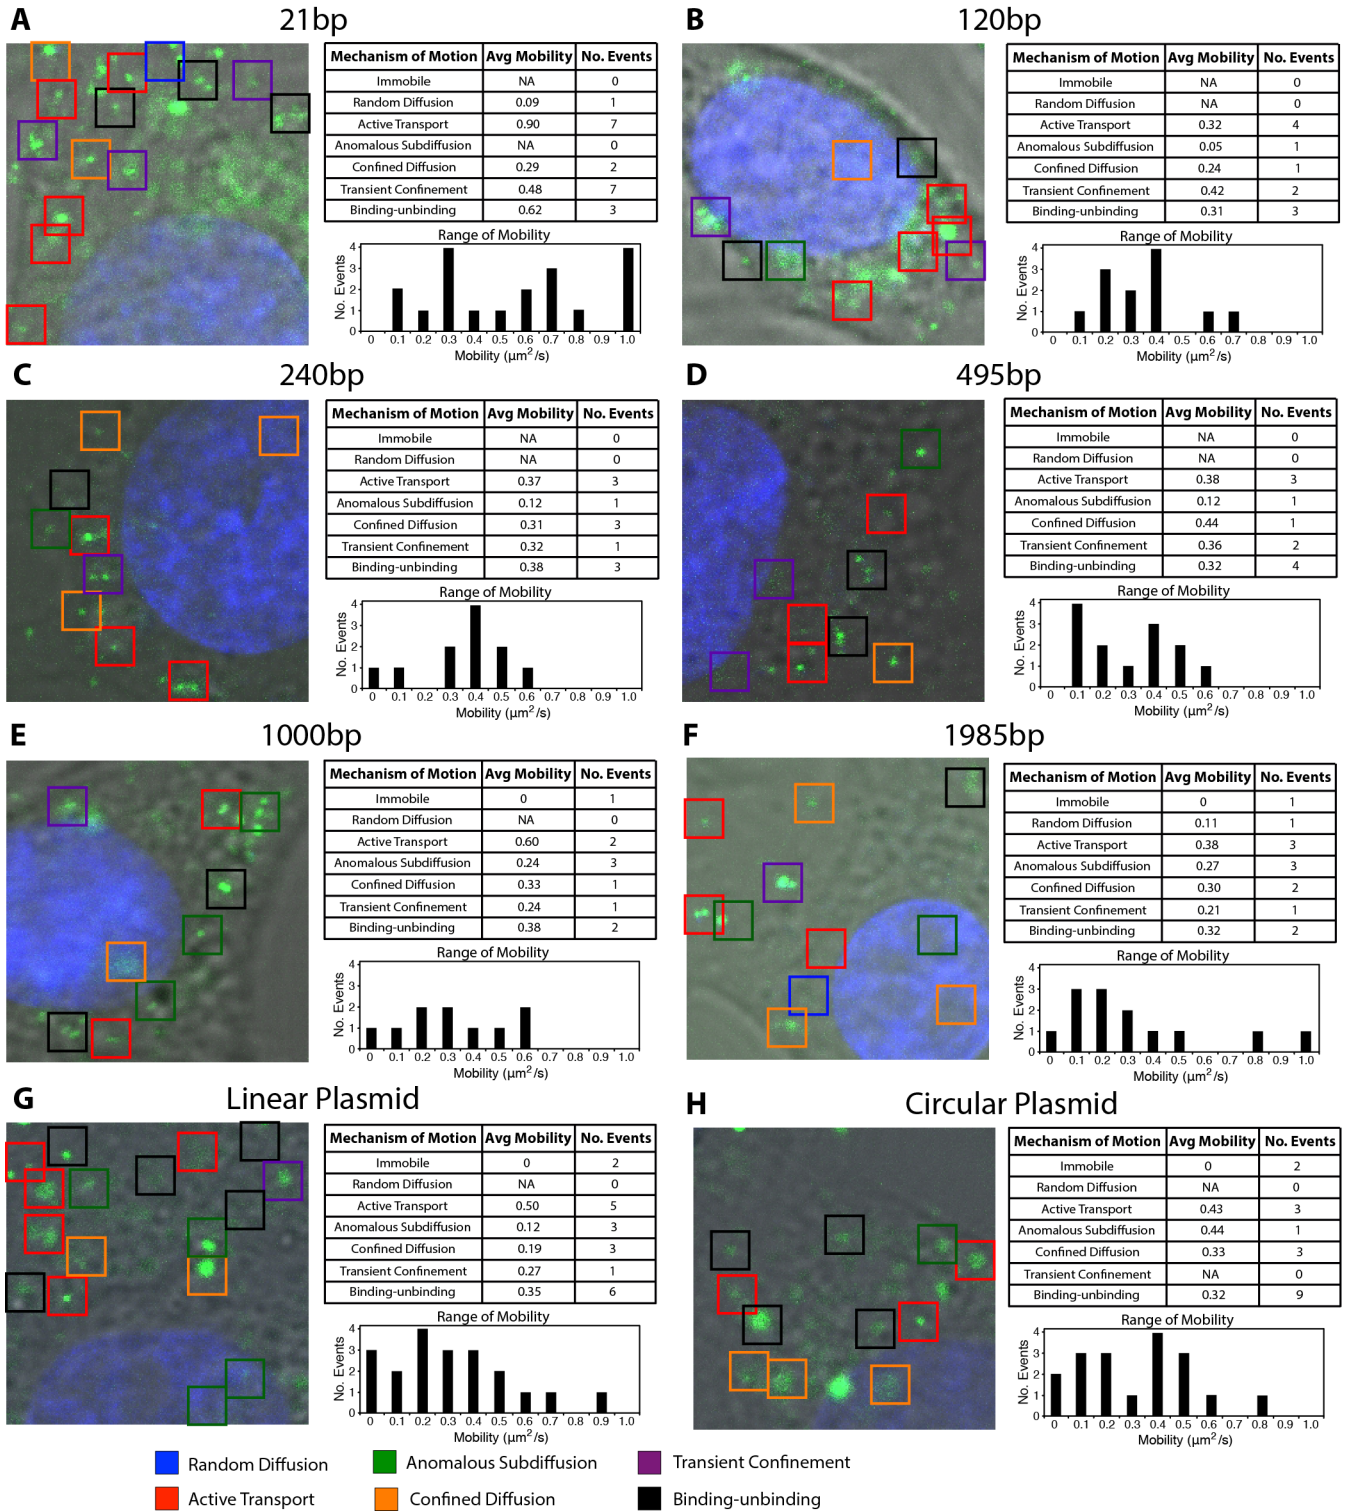

**Supplementary Figure 9. Examples of cells transfected with DNA of various sizes.** An example for each DNA fragment have been presented including 21bp (A), 120bp (B), 240bp (C), 495bp (D), 1000bp (E), 1985bp (F) and, linear (G) and circular (H) plasmid has been presented. Each example has ROIs selected representative of the different mechanisms of motion identified in each cell (legend at the bottom of the figure). In addition summaries of the types of mechanisms found and range of motion observed have been presented.
